# Supplementary material for: Liquid–liquid extraction of neodymium(iii) by dialkylphosphate ionic liquids from acidic medium: the importance of the ionic liquid cation
Source: Royal Society of Chemistry journal article supplement (doi:10.1039/c3cp52218k), 2013-01-01
Supplement: c3cp52218k.pdf [file c3cp52218k.pdf]

Supporting information

**Liquid-liquid extraction of neodymium(III) by dialkylphosphate ionic liquids from  
acidic medium: the importance of the ionic liquid cation**

Alok Rout, Justyna Kotlarska, Wim Dehaen, Koen Binnemans\*

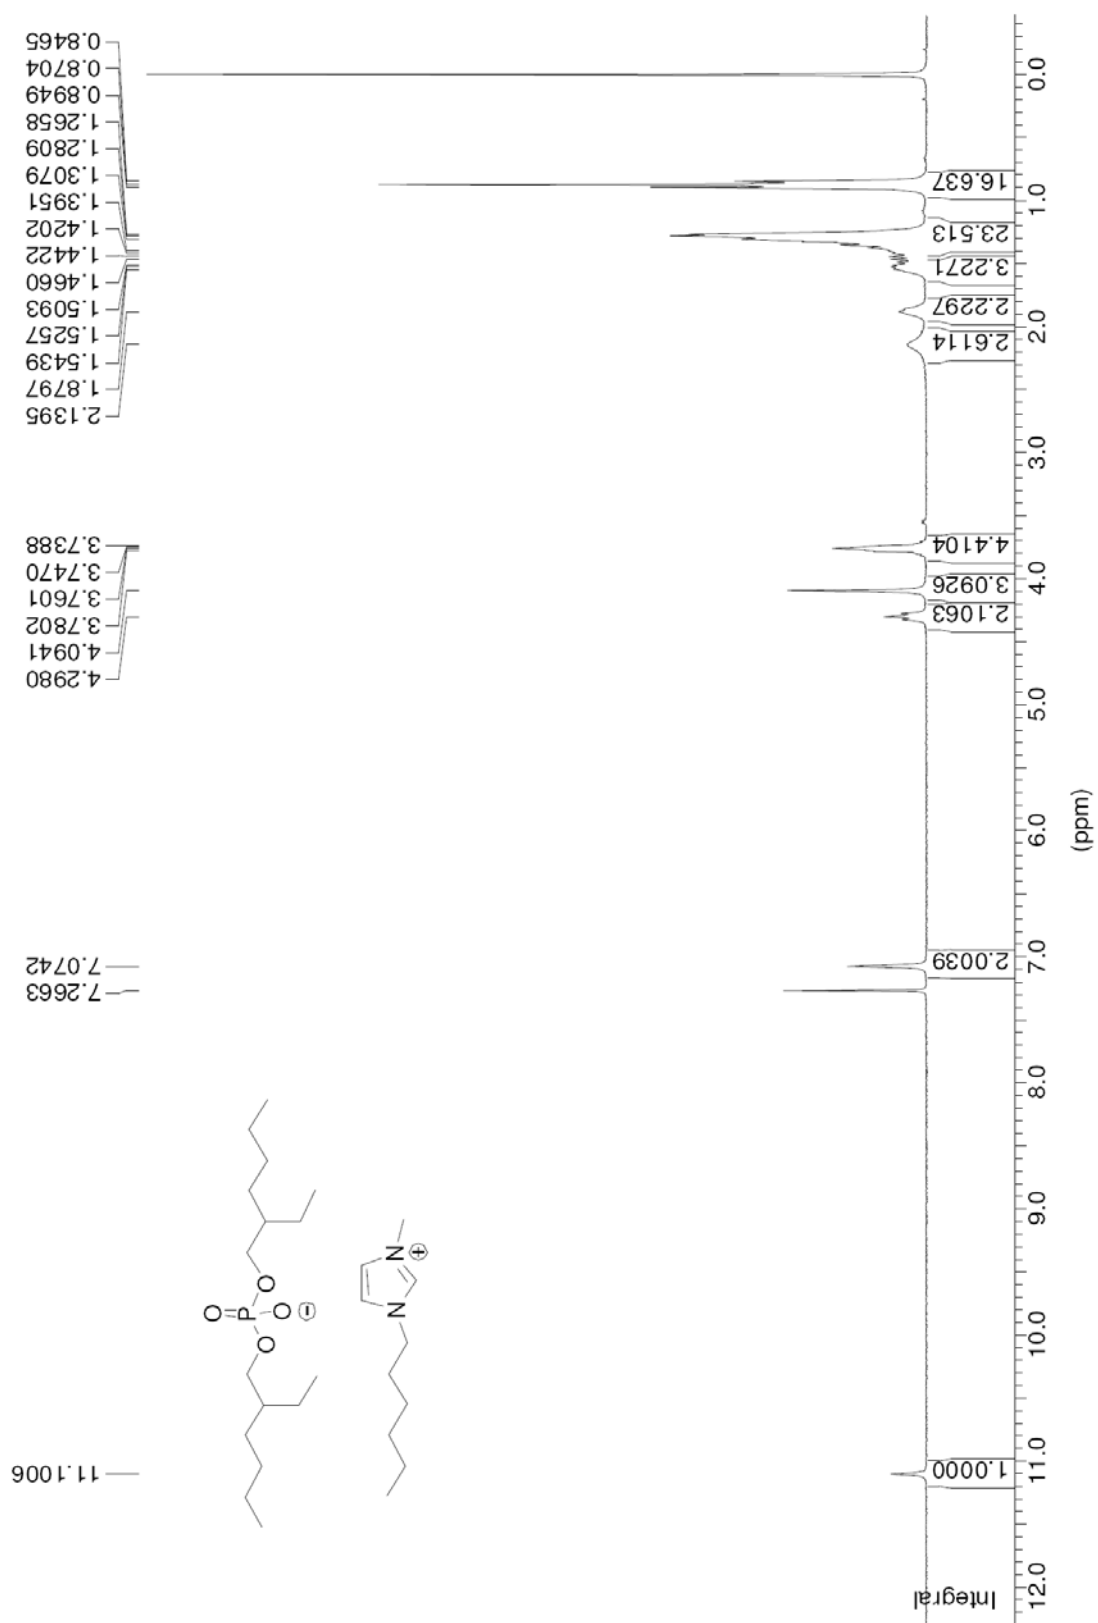

Figure S1. <sup>1</sup>H NMR spectrum of [C<sub>6</sub>mim][DEHP].

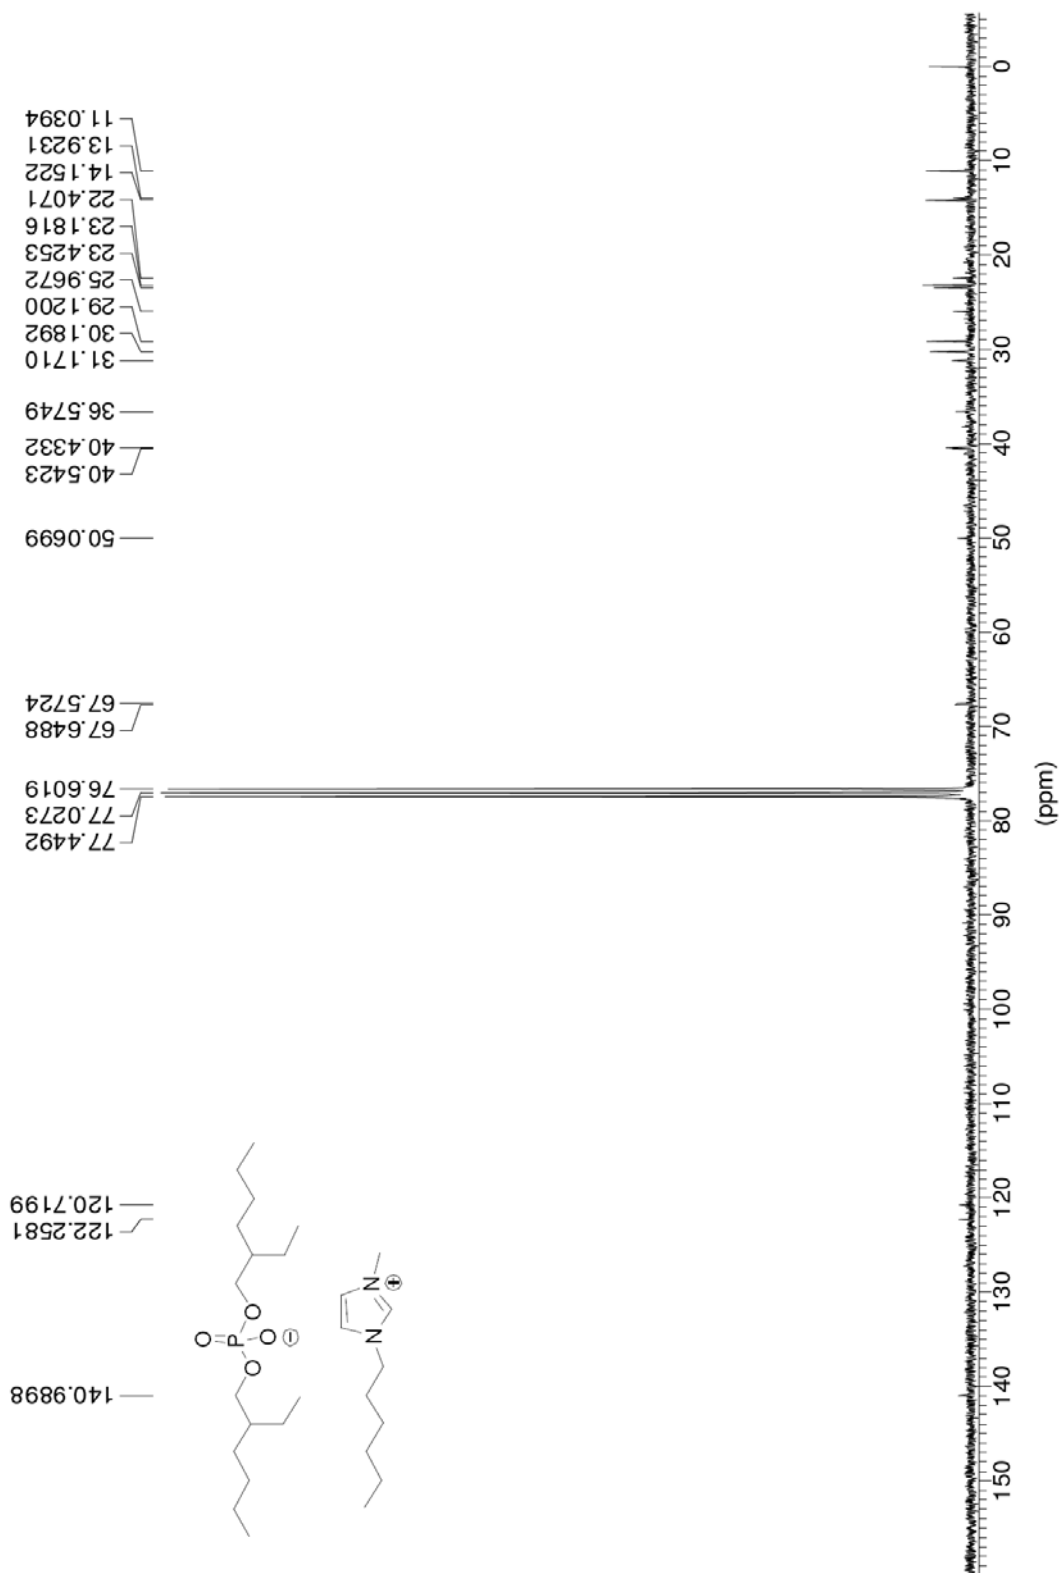

Figure S2.  $^{13}\text{C}$  NMR spectrum of [C<sub>6</sub>mim][DEHP].

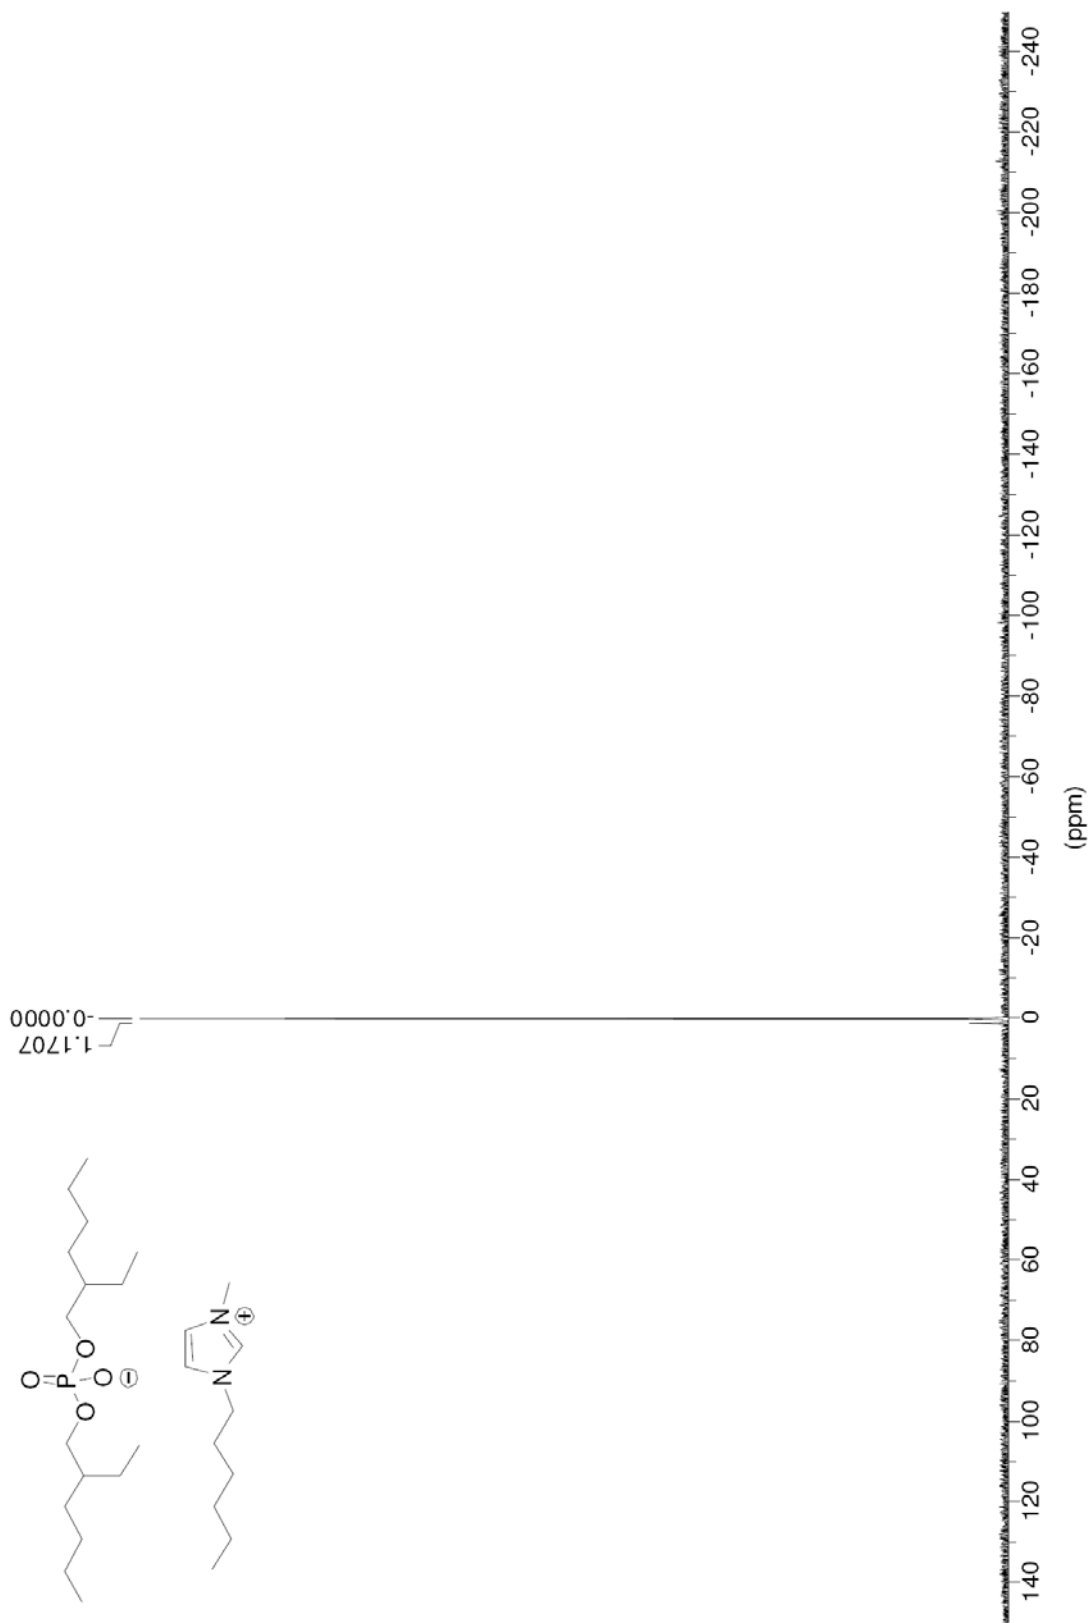

Figure S3. <sup>31</sup>P NMR spectrum of [C<sub>6</sub>mim][DEHP].

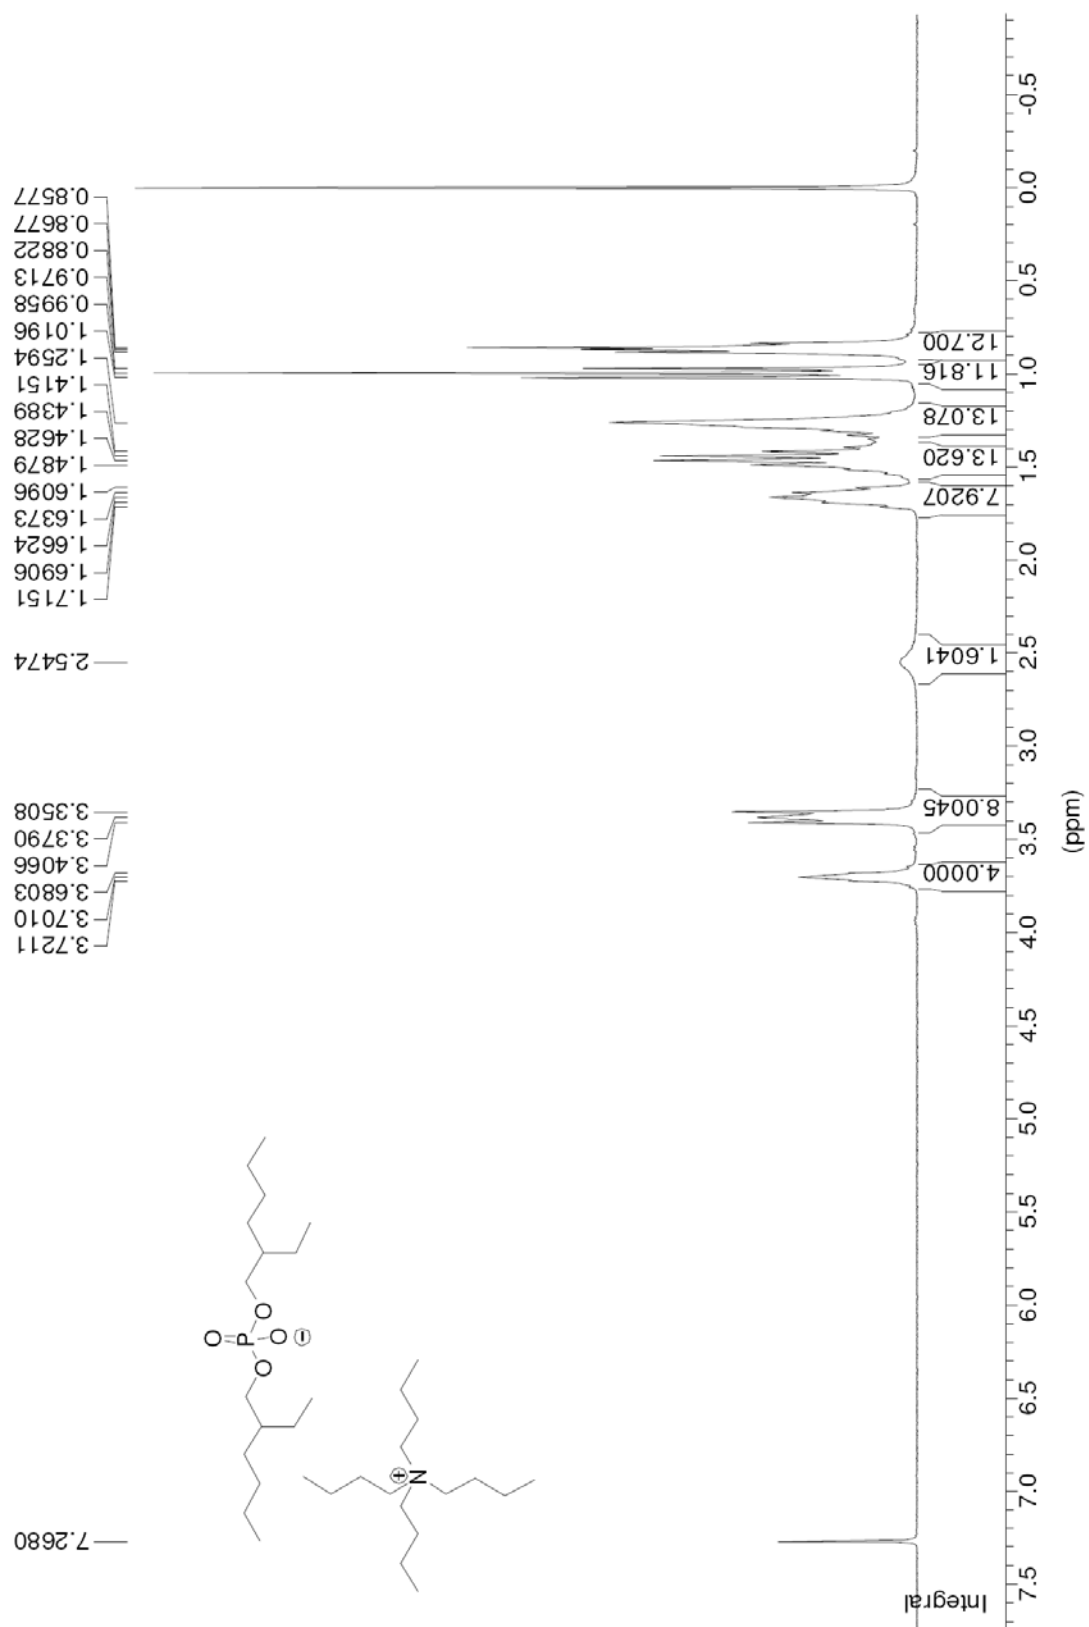

Figure S4. <sup>1</sup>H NMR spectrum of [N<sub>4444</sub>][DEHP].

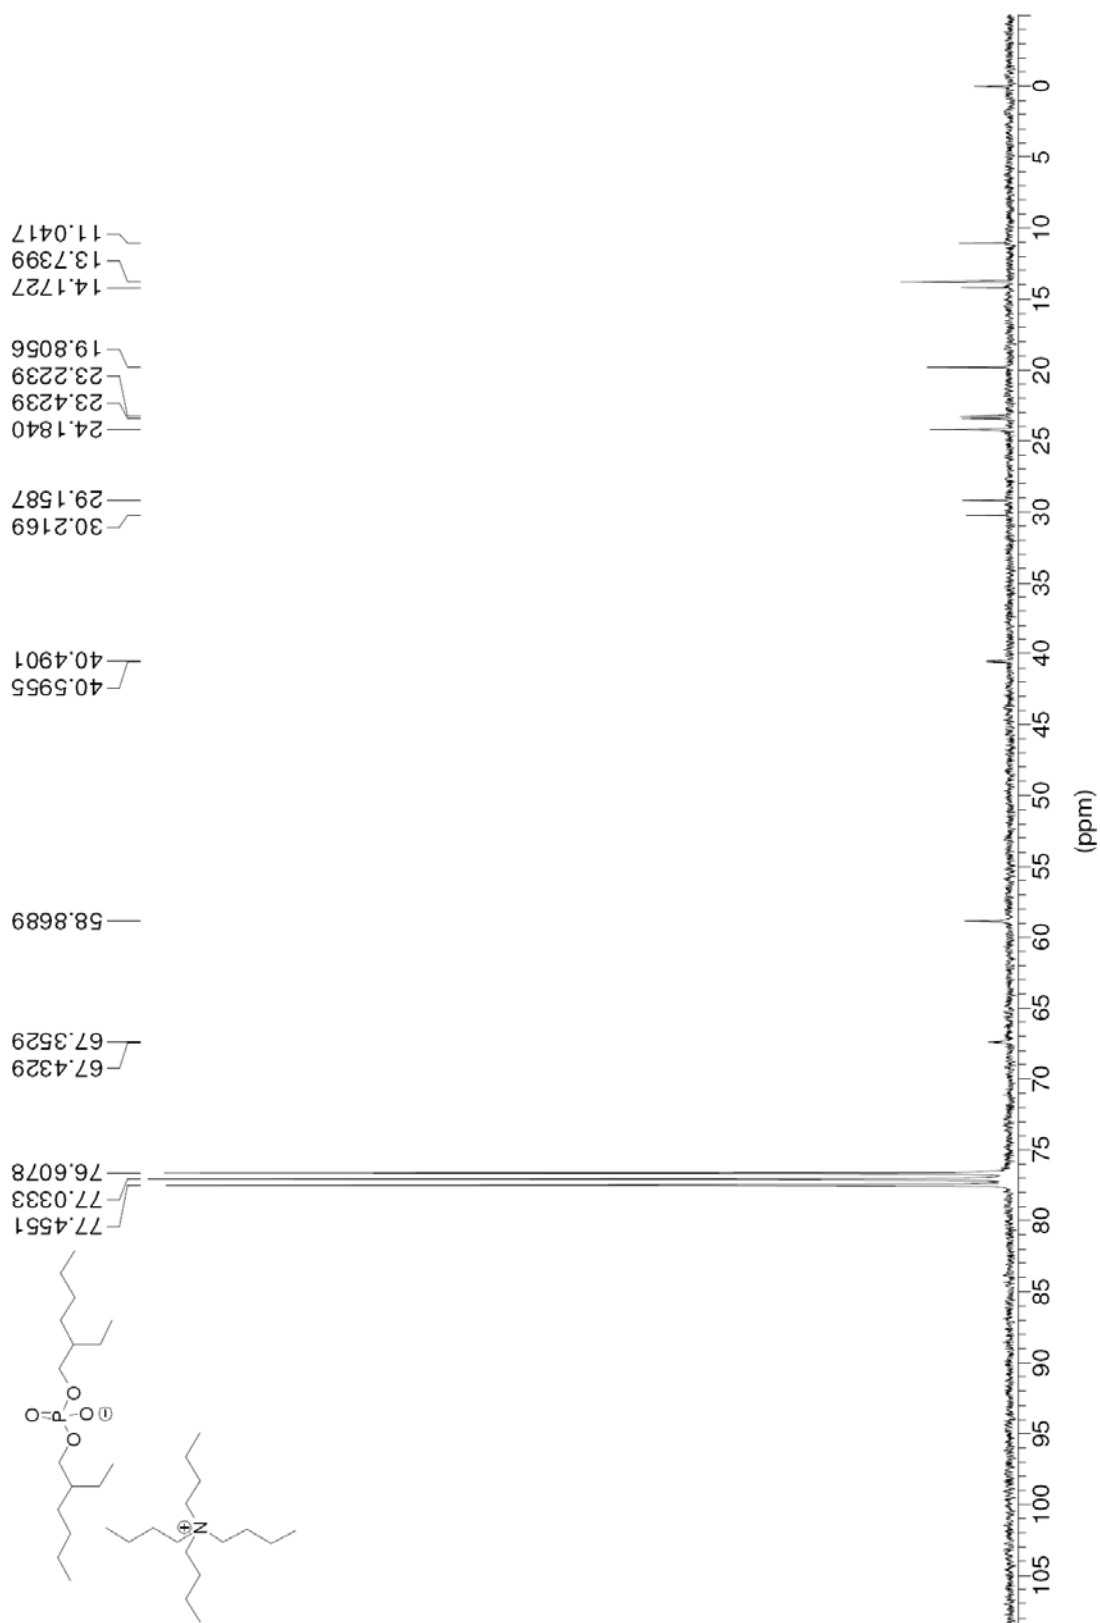

Figure S5.  $^{13}\text{C}$  NMR spectrum of [N<sub>4444</sub>][DEHP].

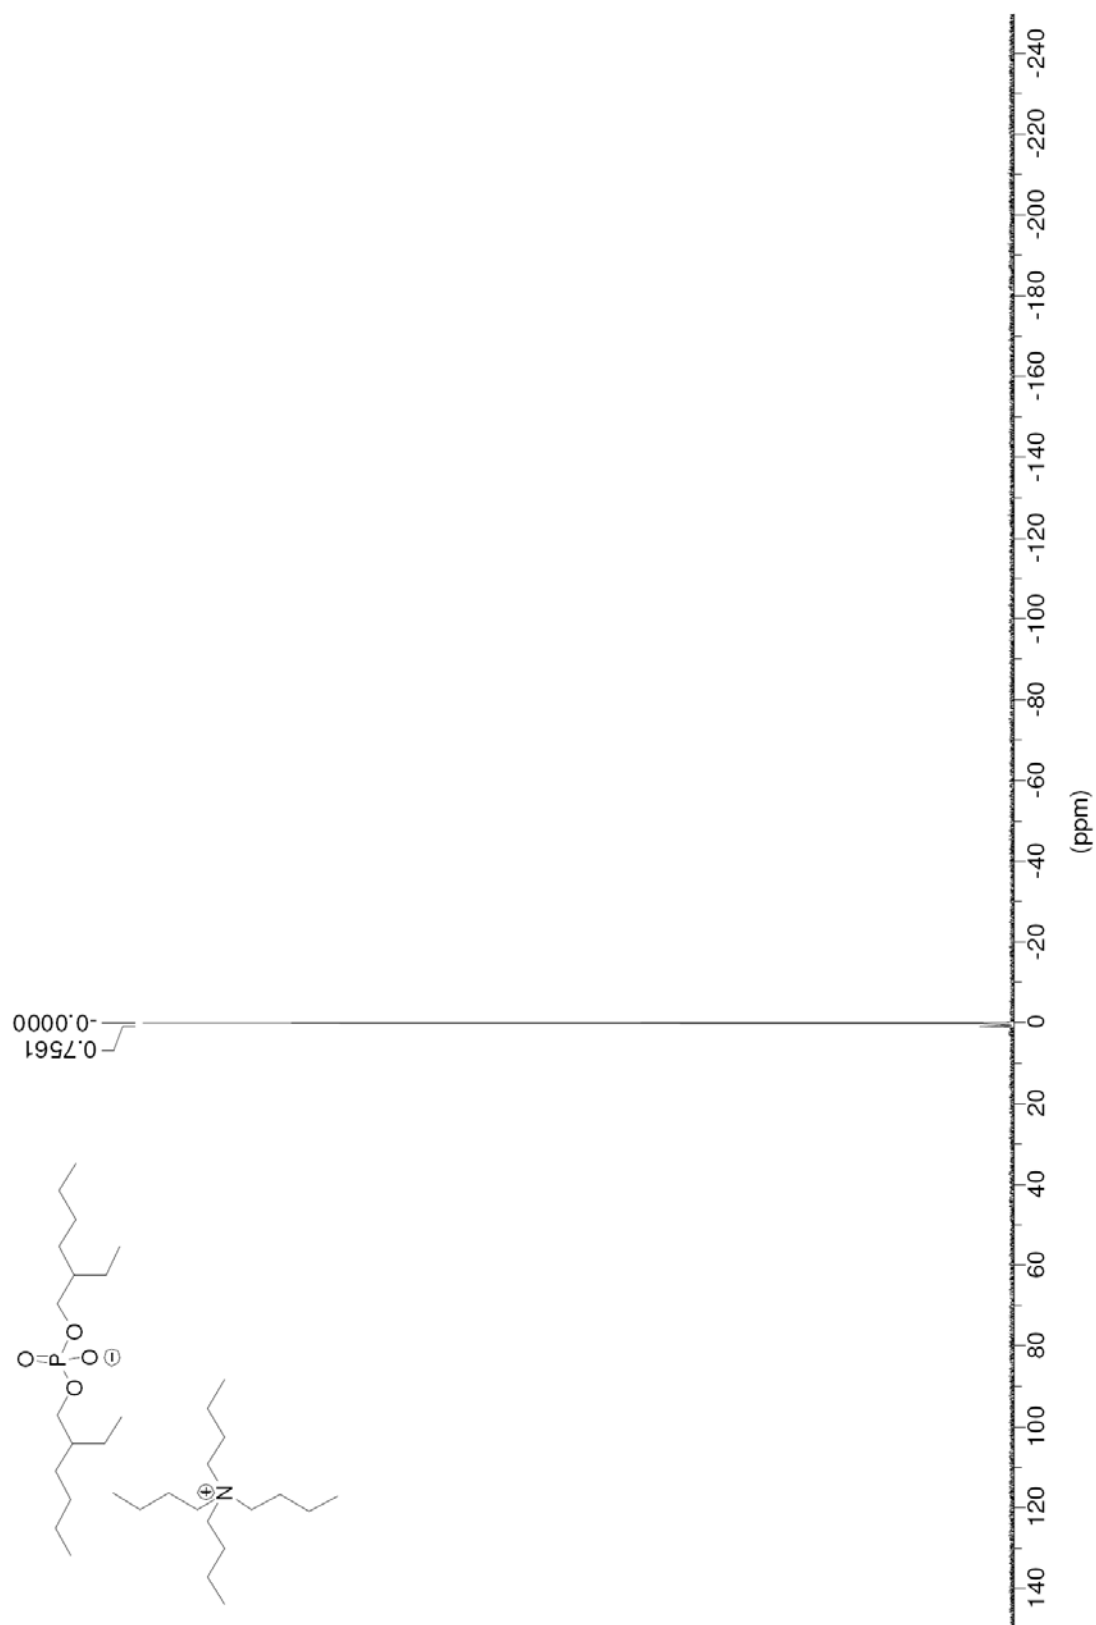

Figure S6.  $^{31}\text{P}$  NMR spectrum of  $[\text{N}_{4444}][\text{DEHP}]$ .

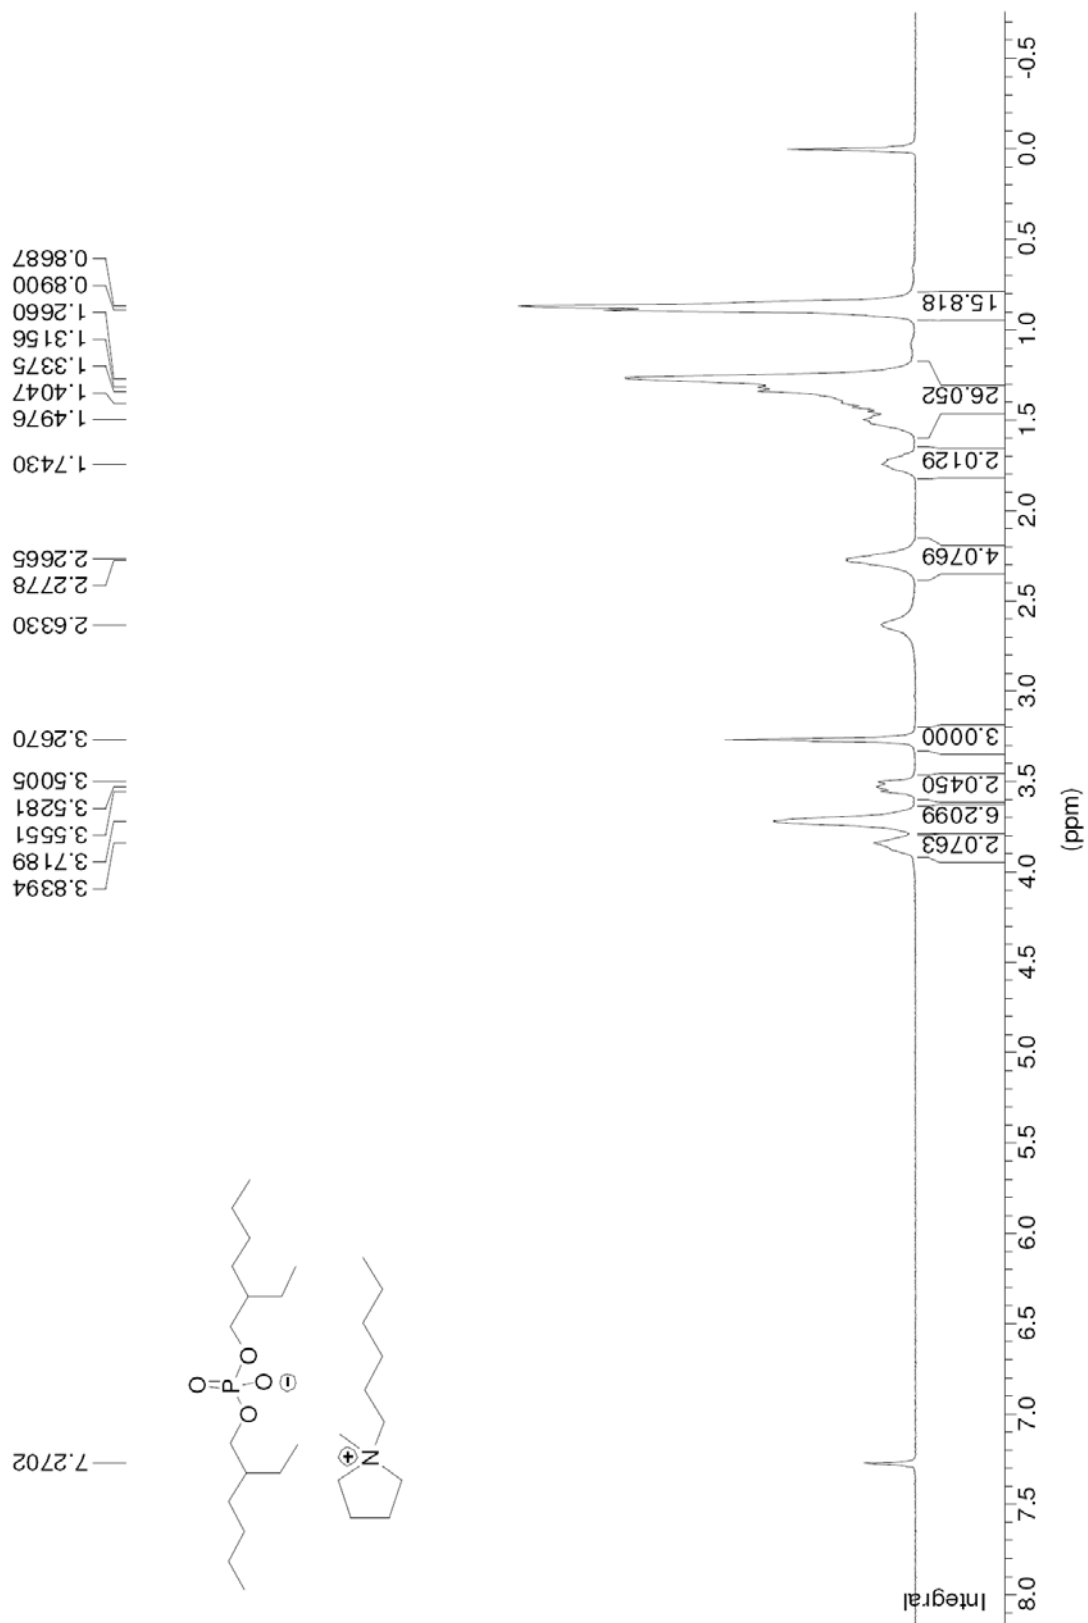

Figure S7.  $^1\text{H}$  NMR spectrum of  $[\text{C}_6\text{mpyr}][\text{DEHP}]$ .



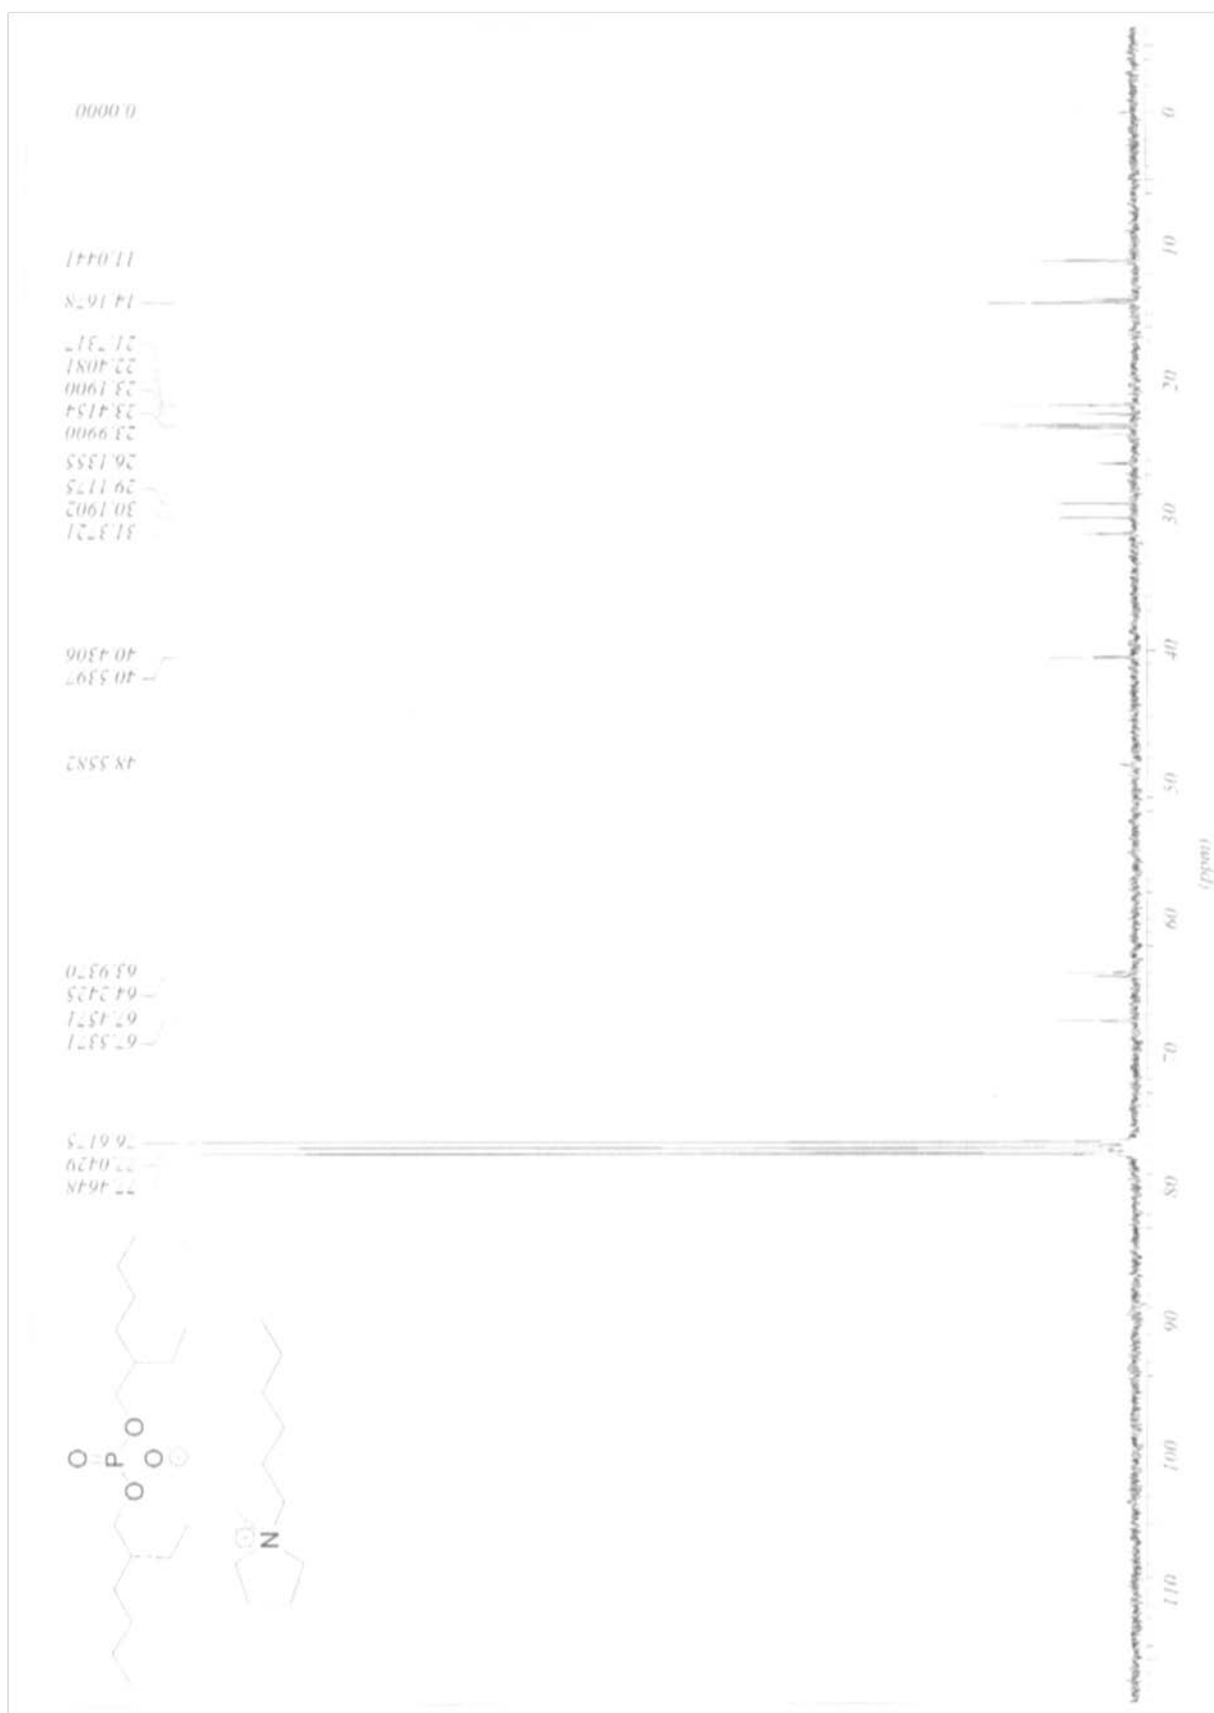

Figure S8.  $^{13}\text{C}$  NMR spectrum of [C<sub>6</sub>mpyr][DEHP].

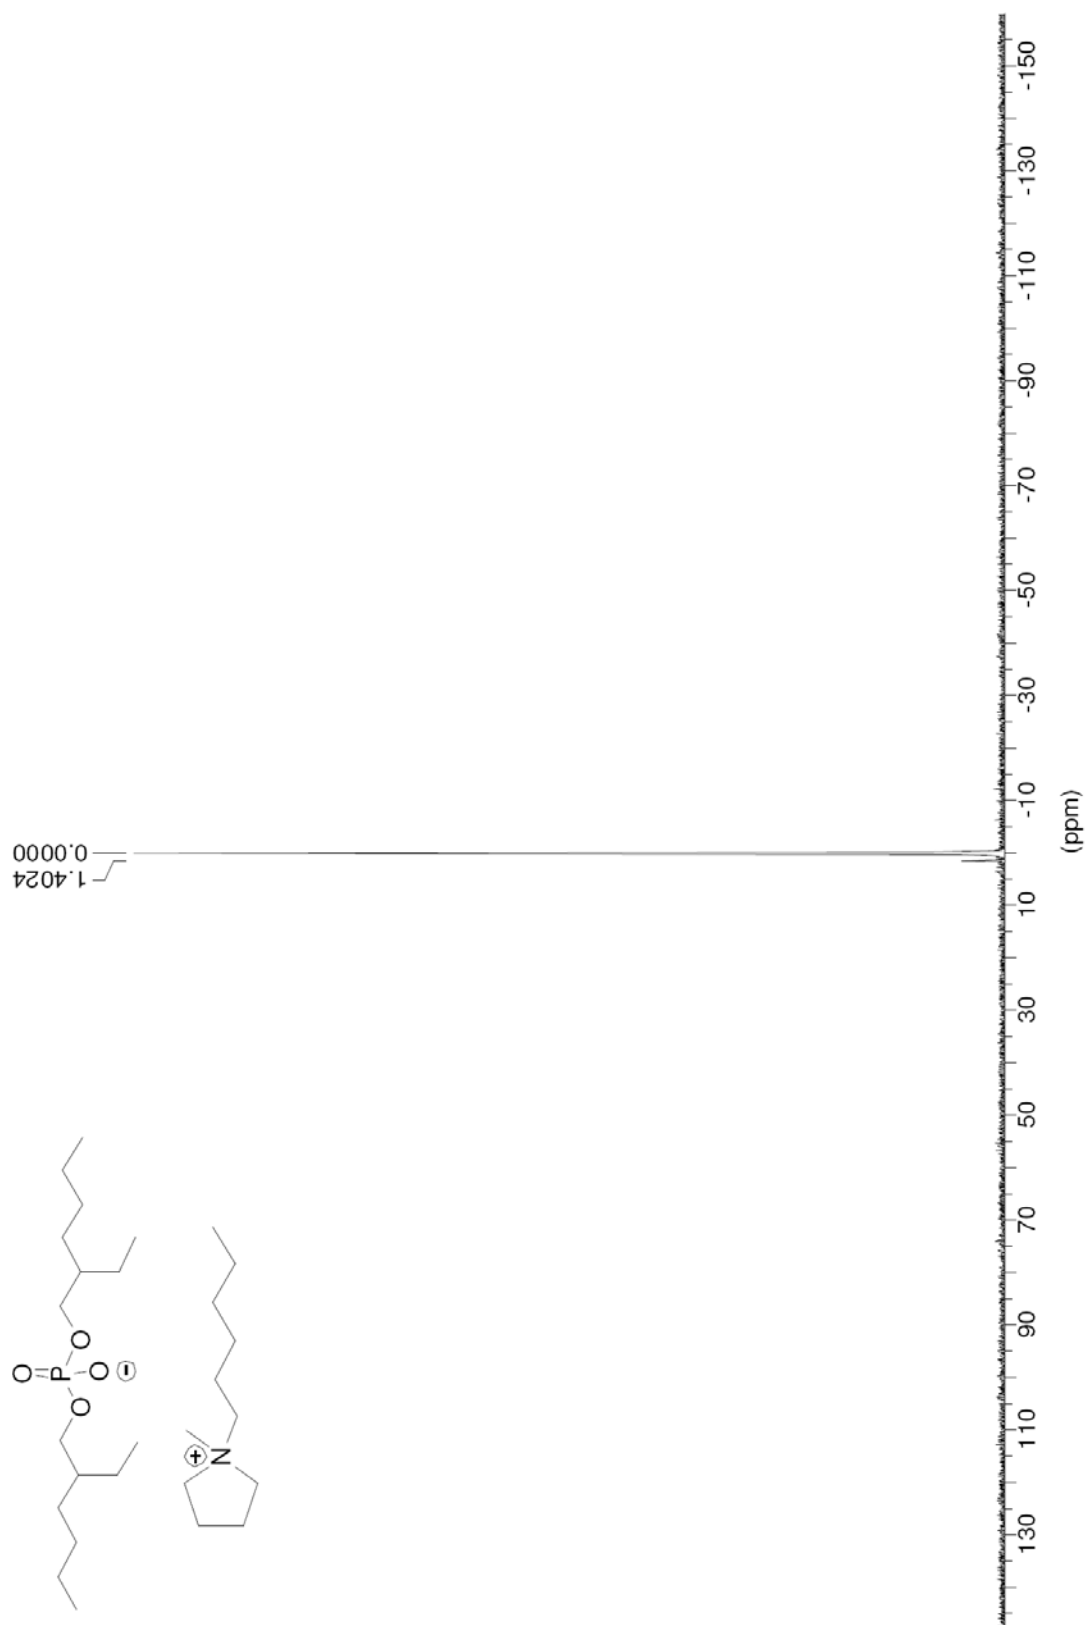

Figure S9. <sup>31</sup>P NMR spectrum of [C<sub>6</sub>mpyr][DEHP].
